# Supplementary material
Source: Springer Nature journal article supplement (https://www.springerprofessional.de/resource/supplementary/13638_2011_154_MOESM5_ESM.pdf/11897168)

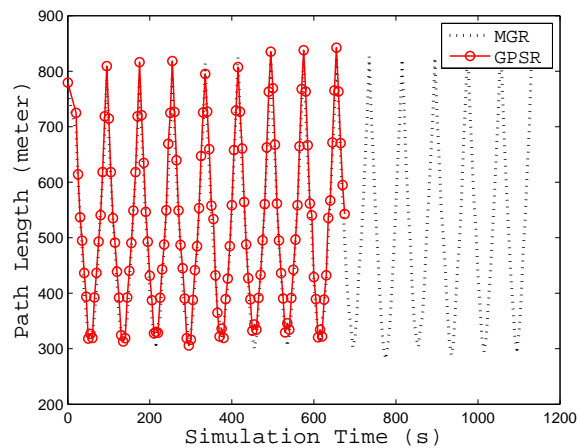

(a) Path Length

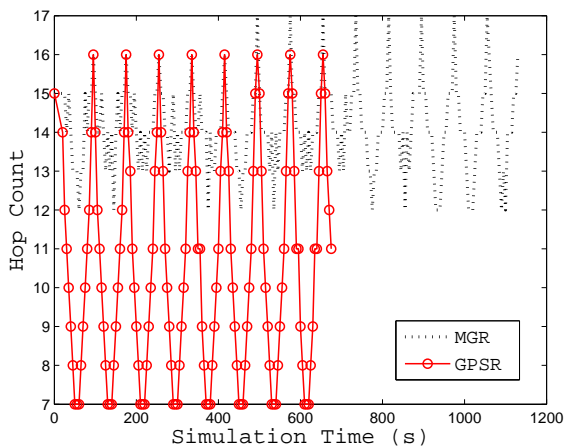

(b) Hop Count

Supplement: MOESM5 [file 11897168]
